# Supplementary material
Source: bioRxiv or medRxiv preprint supplement (https://medrxiv.org/highwire/filestream/96384/field_highwire_adjunct_files/0/2020.09.10.20192260-1.pdf)
Supplement: Supplementary file [file 2020.09.10.20192260-1.pdf]

**Supplementary data**

**Evaluating ten commercially-available SARS-CoV-2 rapid serological tests using the STARD (Standards for Reporting of Diagnostic Accuracy Studies) method.**

Supplemental figures: 4

Supplemental tables: 3

**Supplemental Figures**

**Figure S1.** Index (panel A) and results of negative, weak positive, medium/high positive, and undetermined tests.

**A**

| Rating index | Reading intensity scale            |
|--------------|------------------------------------|
| 0            | Not reactive                       |
| 1            | Very weak, but definitely reactive |
| 2            | Medium to high reactivity          |
| U            | Undetermined                       |

**B**

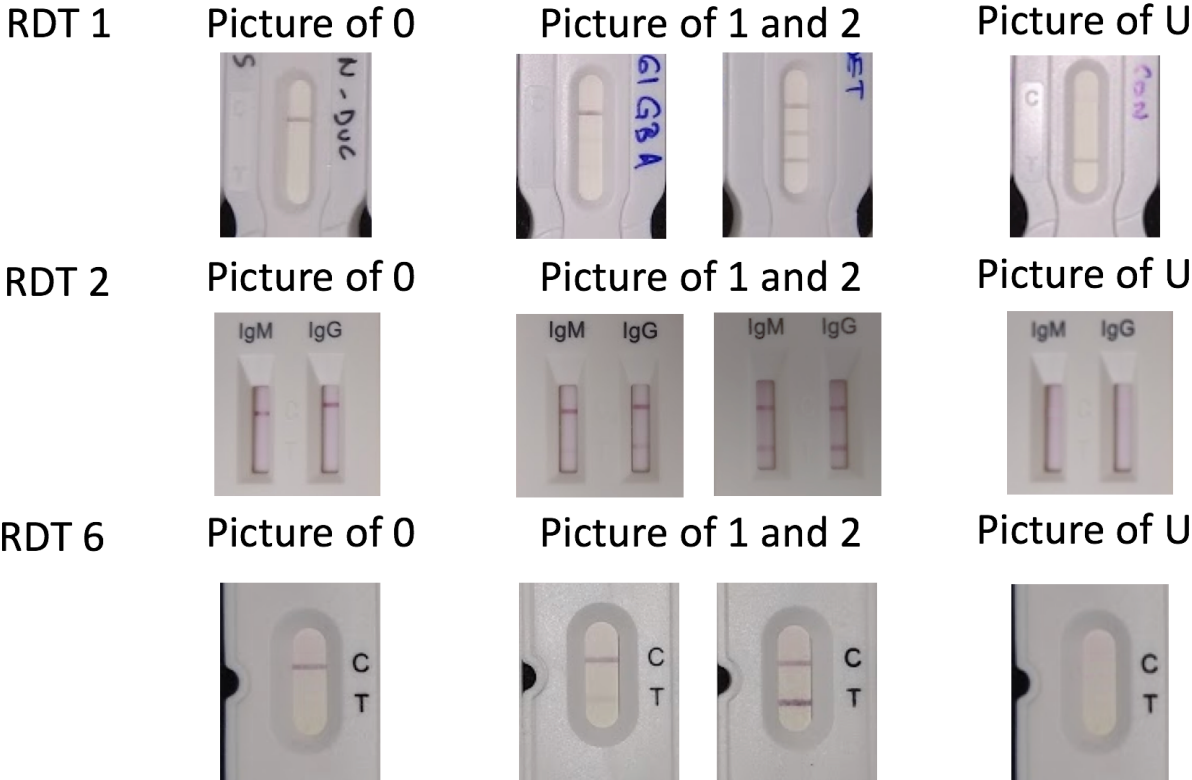

**Figure S2.** Assessment of cumulative positivity stratified by the number days after symptom appearance.

| Day after onset of symptoms | 1 | 2 | 3 | 4 | 5 | 6 | ... | N |
|-----------------------------|---|---|---|---|---|---|-----|---|
| Patient 1                   | n | n | n | n | N |   |     |   |
| Patient 2                   | N |   |   |   |   |   |     |   |
| Patient 3                   |   |   |   |   | P | p | p   | p |
| Patient 4                   | n | n | N |   |   |   | P   | p |
| Patient 5                   | N | n | n | N |   | P | p   | p |
| Patient 6                   | P | p | p | p | p | p | p   | p |

|                                       |           |           |           |              |              |            |            |            |
|---------------------------------------|-----------|-----------|-----------|--------------|--------------|------------|------------|------------|
| Cumulative number of negative results | 4         | 3         | 3         | 2            | 1            | 0          | 0          | 0          |
| Cumulative number of positive results | 1         | 1         | 1         | 1            | 2            | 3          | 4          | 4          |
| <b>Cumulative % of positivity</b>     | <b>20</b> | <b>25</b> | <b>25</b> | <b>33,33</b> | <b>66,67</b> | <b>100</b> | <b>100</b> | <b>100</b> |

|                                                                                                                    |                                                                                                                    |
|--------------------------------------------------------------------------------------------------------------------|--------------------------------------------------------------------------------------------------------------------|
|  Sample tested positive         |  Sample tested negative         |
|  Sample interpreted as positive |  Sample interpreted as negative |

Only one serum was available (and tested) for atients 1, 2, 3 and 6  
 Two sera were available (and tested) patient 4  
 Three sera were available (and tested) for patient 5

**Figure S3.** Best fit asymmetric curve for RDT 1, RDT 6 and RDT 9 test cumulative positivity.

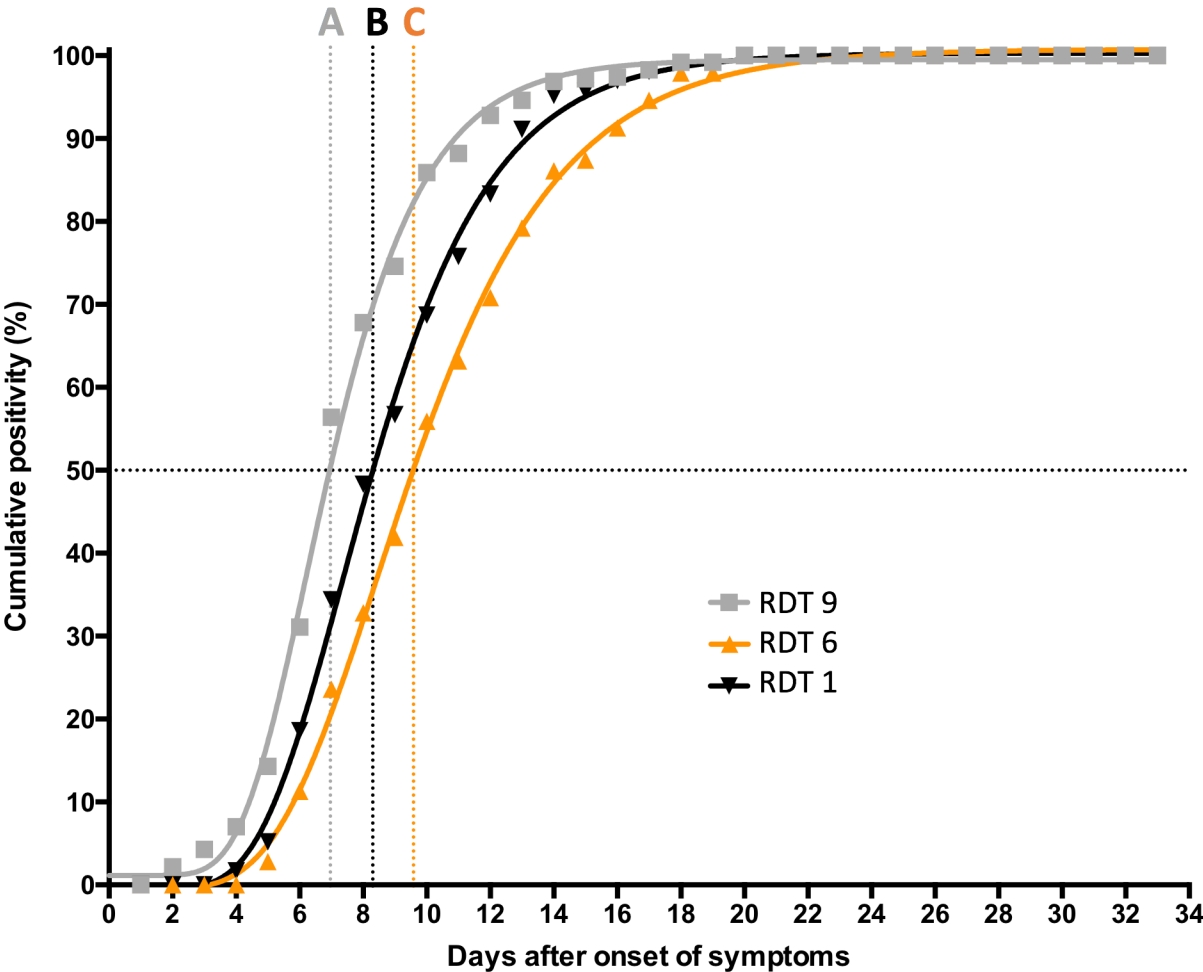

A = 6.962 (CI95%: 6.837 – 7.087)  
B = 8.297 (CI95%: 8.185 – 8.409)  
C = 9.579 (CI95%: 9.437 – 9.722)

**Figure S4.** Influence of population prevalence of seropositivity on assay performance.

Scenarios with increasing population prevalence (x-axis) are shown for each RDT. PPV (Positive Predictive value) and NPV (Negative predictive value) expressed in percentage (y axis) have been calculated using VassarStats [25]. Zones for which both PPV and NPV are above 90% (red zone) or above 95% (green zone) are indicated.

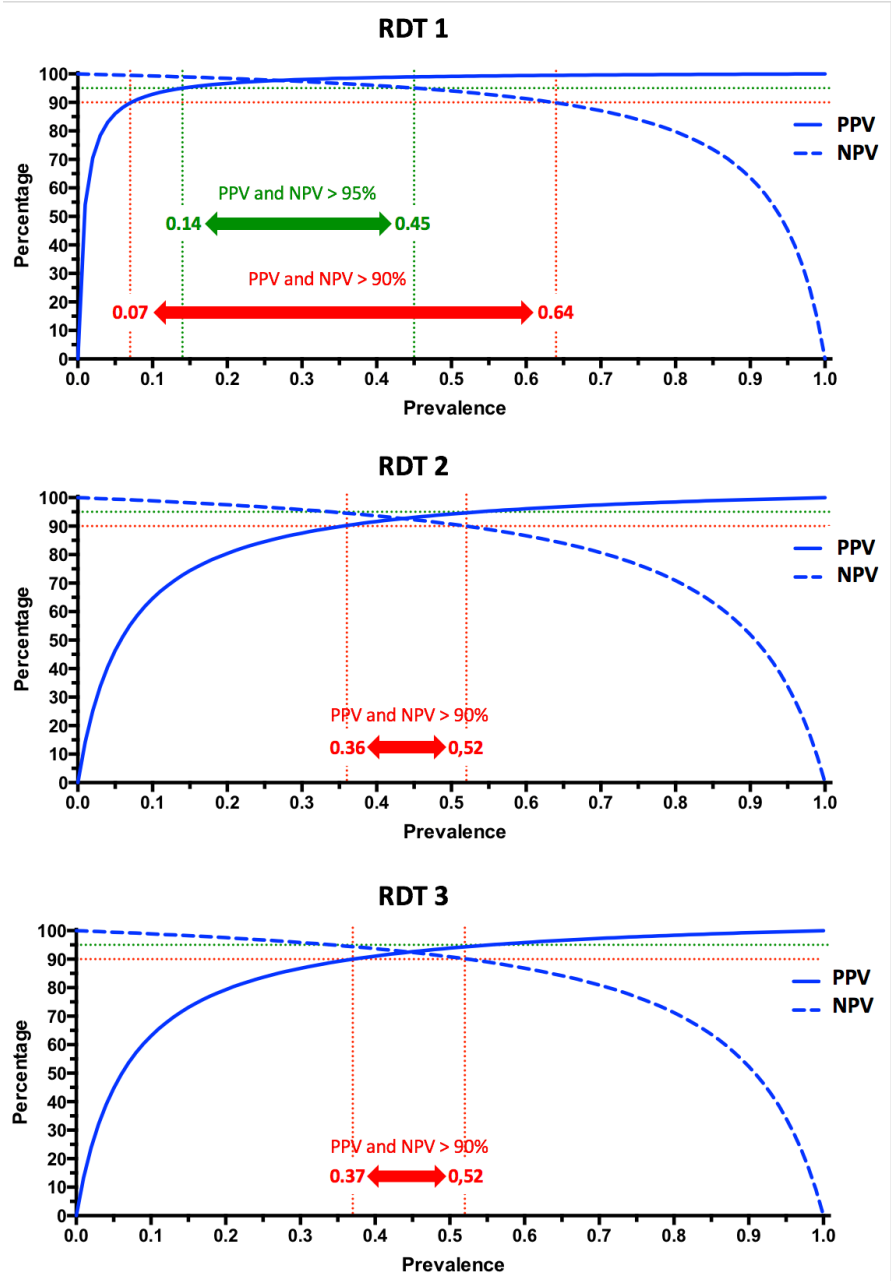

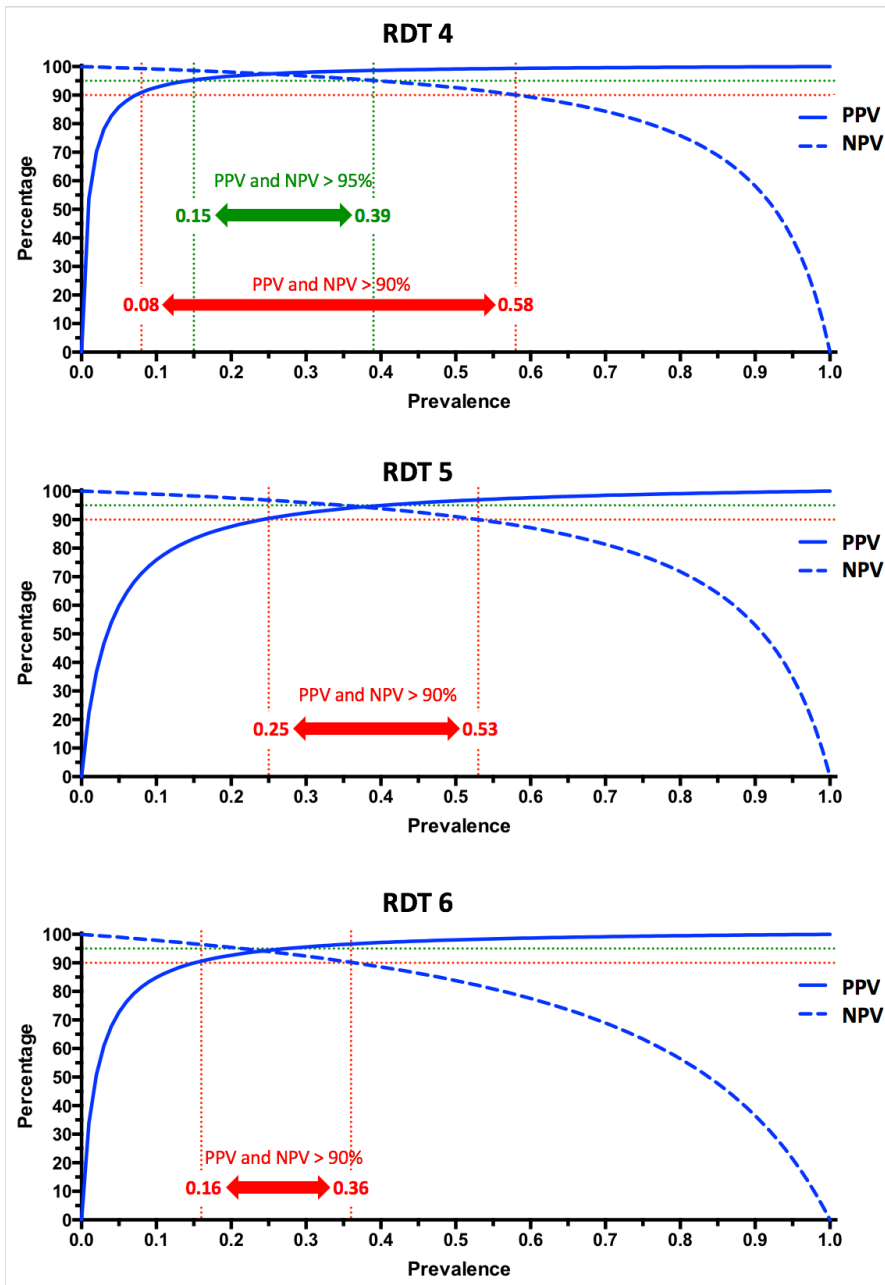

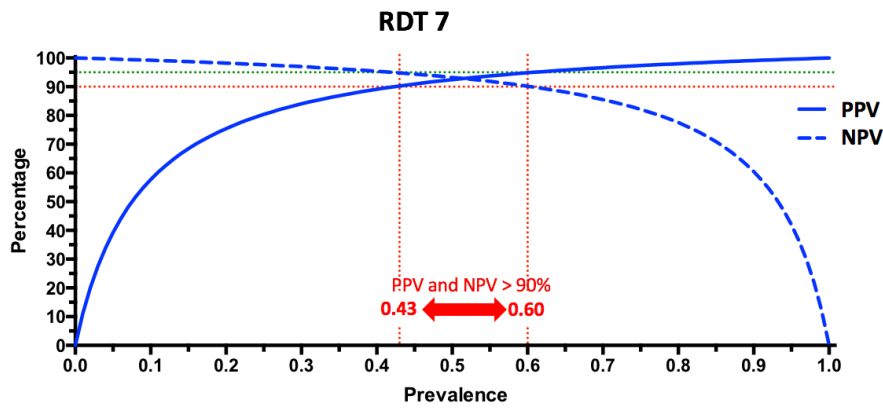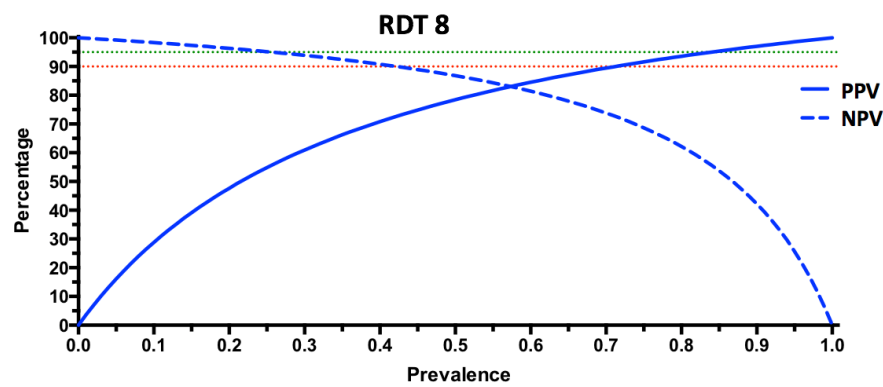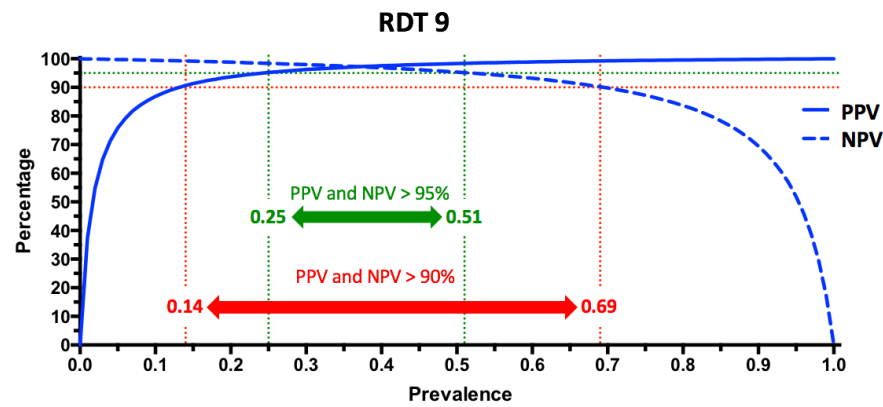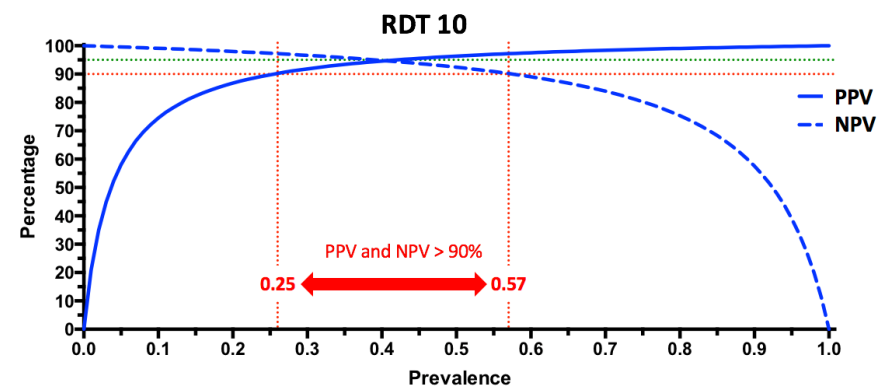

**Table S1: Immunoassay kit and manufacturer information**

|                                    | RDT 1                                                                             | RDT 2                                         | RDT 3                                                        | RDT 4                                                        | RDT 5                                                        | RDT 6                                                           | RDT 7                                                        | RDT 8                                                        | RDT 9                                                          | RDT 10                                                         |
|------------------------------------|-----------------------------------------------------------------------------------|-----------------------------------------------|--------------------------------------------------------------|--------------------------------------------------------------|--------------------------------------------------------------|-----------------------------------------------------------------|--------------------------------------------------------------|--------------------------------------------------------------|----------------------------------------------------------------|----------------------------------------------------------------|
| <b>Name</b>                        | NG-Test IgG-IgM COVID-19                                                          | Anti-SARS-CoV-2 Rapid test                    | Novel Coronavirus (2019-nCoV) Antibody IgG/IgM Assay Kit     | NADAL COVID-19 IgG/IgM Test                                  | Biosynex COVID-19 BSS                                        | 2019-nCoV Ab Test                                               | 2019-nCoV IgG/IgM                                            | COVID-19-CHECK-1                                             | Finecare SARS-CoV-2 Antibody Test                              | Wondfo SARS-CoV-2 Antibody Test                                |
| <b>Manufacturer</b>                | NG Biotech SA, Guipry, France                                                     | Autobio Diagnostics Co, Ltd, Zhengzhou, China | Avioq Bio-tech Co, Ltd, Shandong, China                      | Nal Von Minden Co, Ltd, Moers, Germany                       | Biosynex SWISS SA, Fribourg, Switzerland                     | Innovita (Tangshan) Biological Technology Co, Ltd, Hebei, China | Biolidics Co, Ltd, Mapex, Singapore                          | Vedal Lab SA, Alençon, France                                | Wondfo Biotech Co, Ltd, Guangzhou, China                       | Wondfo Biotech Co, Ltd, Guangzhou, China                       |
| Catalogue No./manufacturer Ref     | NGB-COV-W23-002                                                                   | RTA0202                                       | ---                                                          | COV20030034                                                  | SW40005                                                      | ---                                                             | C8B-F015016-B1                                               | 200081-4-2-3L                                                | W276                                                           | W195                                                           |
| Lot number tested                  | 200414-01                                                                         | 21C22-J01                                     | 20200201                                                     | 243001                                                       | COV20040003                                                  | 20200402                                                        | V5020032352                                                  | 23040-46                                                     | F27614309AD                                                    |                                                                |
| <b>Product description</b>         |                                                                                   |                                               |                                                              |                                                              |                                                              |                                                                 |                                                              |                                                              |                                                                |                                                                |
| Antibody detection                 | IgG-IgM                                                                           | IgG-IgM                                       | IgG-IgM                                                      | IgG-IgM                                                      | IgG-IgM                                                      | IgG-IgM                                                         | IgG-IgM                                                      | IgG-IgM                                                      | Total Ab                                                       | IgG/IgM 1 test, 1 line                                         |
| Antigens *                         | NP, SP                                                                            | ---                                           | ---                                                          | ---                                                          | ---                                                          | NP, SP                                                          | ---                                                          | ---                                                          | ---                                                            | ---                                                            |
| Detection conjugate                | Colloidal gold                                                                    | Colloidal gold                                | Colloidal gold                                               | Colloidal gold                                               | Colloidal gold                                               | Colloidal gold                                                  | Colloidal gold                                               | Colloidal gold                                               | Fluorescent conjugate                                          | Colloidal gold                                                 |
| Type of reading                    | Visual                                                                            | Visual                                        | Visual                                                       | Visual                                                       | Visual                                                       | Visual                                                          | Visual                                                       | Visual                                                       | UV automatic reader                                            | Visual                                                         |
| Format                             | cassette with single lane and different band for IgG and IgM                      | cassette with separate lane for IgG and IgM   | cassette with single lane and different band for IgG and IgM | cassette with single lane and different band for IgG and IgM | cassette with single lane and different band for IgG and IgM | cassette with separate lane and different band for IgG and IgM  | cassette with single lane and different band for IgG and IgM | cassette with single lane and different band for IgG and IgM | cassette with single lane and single band for both IgG and IgM | cassette with single lane and single band for both IgG and IgM |
| <b>Specifications</b>              |                                                                                   |                                               |                                                              |                                                              |                                                              |                                                                 |                                                              |                                                              |                                                                |                                                                |
| Sample type                        | WB/Serum/Plasma                                                                   | WB/Serum/Plasma                               | WB/Serum/Plasma                                              | WB/Serum/Plasma                                              | WB/Serum/Plasma                                              | WB/Serum/Plasma                                                 | WB/Serum/Plasma                                              | WB/Serum/Plasma                                              | WB/Serum/Plasma                                                | WB/Serum/Plasma                                                |
| Sample volume                      | 10µL                                                                              | 5µL                                           | 10µL                                                         | 5µL (S, P), 10µL (WB)                                        | 10µL                                                         | 10µL                                                            | 20µL                                                         | 10 µL                                                        | 10µL                                                           | 10 µL                                                          |
| Pipette for sample volume provided | Not provided but system integrated to device for direct transfer for Capillary WB | Not provided                                  | transfer system, lancet                                      | Not provided                                                 | Plastic disposable pipettes                                  | Not provided                                                    | Not provided                                                 | Not provided                                                 | pipette tips and tubes of detection buffer                     | Not provided                                                   |
| Diluent volume                     | 2 drops                                                                           | 60µL                                          | 2 drops (50-70µL)                                            | 2 drops                                                      | 2 drops (80 µL)                                              | 2 drops (80 µL)                                                 | 3 drops                                                      | 3 drops (100 µL)                                             | ---                                                            | 2-3 drops                                                      |
| Diluant bottle format              | 1.5 mL                                                                            | 4,5 mL                                        | 4.5 mL                                                       | 3 mL                                                         | ---                                                          | 5 mL                                                            | 5 mL                                                         | 3 mL                                                         | 25 tubes of detection buffer                                   | ---                                                            |
| Time to result                     | 15 min                                                                            | 15-20 min                                     | 15 min                                                       | 15 min                                                       | 20 min                                                       | 15 min                                                          | 10 min                                                       | 10-15 min                                                    | 10 min                                                         | 15 min                                                         |
| Limit Of Detection                 | ---                                                                               | ---                                           | ---                                                          | 3,4 ng/mL (IgG), 210 ng/mL (IgM)                             | ---                                                          | ---                                                             | ---                                                          | ---                                                          | ---                                                            | ---                                                            |
| Interference reported              | None reported                                                                     | None reported                                 | None reported                                                | None reported                                                | SARS-CoV Ab, Rheumatoid Factors, MERS-CoV Ab                 | None reported                                                   | ---                                                          | None reported                                                | None reported                                                  | None reported                                                  |
| Cross-reactivity reported on IFU   | None reported                                                                     | None reported                                 | None reported                                                | None reported                                                | None                                                         | None                                                            | ---                                                          | None reported                                                | None reported                                                  | None reported                                                  |
| Shelf-life (months)                | 24 m                                                                              | 12 m                                          | 18 m                                                         | 24 m                                                         | 24 m                                                         | 18 m                                                            | 24 m                                                         | 12 m                                                         | 12 m                                                           | 12 m                                                           |
| Storage temperature (°C)           | 2-30°C                                                                            | 2-30°C                                        | 4-30°C                                                       | 2-30°C                                                       | 2-30°C                                                       | 4-30°C                                                          | 4-30°C                                                       | 2-30°C                                                       | 4-30°C                                                         | 4-30°C                                                         |
| Package size                       | 5 test/ box                                                                       | 20 test/box                                   | 20 test/box                                                  | 10 test/bags                                                 | 25 test/box                                                  | 40 test/box                                                     | 50 test/box                                                  | 20 test/box                                                  | 25 test/box                                                    | 20 test/box                                                    |
| Controls                           | Internal control line                                                             | Internal control line                         | Internal control line                                        | Internal control line                                        | Internal control line                                        | Internal control line                                           | Internal control line                                        | Internal control line                                        | Internal control line                                          | Internal control line                                          |
| Performance notes                  | ---                                                                               | Some band smearing                            | ---                                                          | ---                                                          | ---                                                          | Some band smearing                                              | ---                                                          | ---                                                          | ---                                                            | ---                                                            |
| <b>Regulatory approval</b>         |                                                                                   |                                               |                                                              |                                                              |                                                              |                                                                 |                                                              |                                                              |                                                                |                                                                |
| IVD Certification                  | CE-IVD                                                                            | CE IVD, Chinese FDA-EUA,                      | CE IVD, Chinese FDA-EUA,                                     | CE-IVD                                                       | CE-IVD                                                       | CE IVD, Chinese FDA-EUA,                                        | CE-IVD                                                       | CE-IVD                                                       | CE, Chinese FDA-EUA, Taiwan FDA                                | CE, Chinese FDA-EUA, Taiwan FDA                                |
| Pictures of the Kit content        |                                                                                   |                                               |                                                              |                                                              |                                                              |                                                                 |                                                              |                                                              |                                                                |                                                                |
| Kit Acquisition for study          | Provided by supplier<br>Free of charge                                            | Purchased from supplier                       | Provided by supplier<br>Free of charge                       | Purchased from supplier                                      | Purchased from supplier                                      | Purchased from supplier                                         | Purchased from supplier                                      | Purchased from supplier                                      | Provided by supplier<br>Free of charge                         | Provided by supplier<br>Free of charge                         |



**Table S2.** Results obtained with the 254 sera of COVID negative patients

| Tests             | Rhumatoid factor |    | Hyper IgG |    | Hyper IgM |    | Sera with TPHA + |    | Other coronavirus |    | Other |    |    | Malaria |    | Total |     |    |
|-------------------|------------------|----|-----------|----|-----------|----|------------------|----|-------------------|----|-------|----|----|---------|----|-------|-----|----|
|                   | TN               | FP | TN        | FP | TN        | FP | TN               | FP | TN                | FP | TN    | FP | NI | TN      | FP | n     | TN  | FP |
| <b>NG-Biotech</b> | 3                | 0  | 6         | 0  | 3         | 0  | 94               | 1  | 11                | 0  | 128   | 1  | 0  | 5       | 0  | 252   | 250 | 2  |
| <b>Autobio</b>    | 3                | 0  | 6         | 0  | 3         | 0  | 89               | 8  | 11                | 0  | 122   | 6  | 1  | 5       | 0  | 254   | 239 | 14 |
| <b>Avioq</b>      | 0                | 3  | 5         | 0  | 2         | 1  | 86               | 5  | 10                | 1  | 121   | 4  | 0  | ND      | ND | 238   | 224 | 14 |
| <b>Nadal</b>      | 3                | 0  | 6         | 0  | 3         | 0  | 97               | 0  | 11                | 0  | 127   | 2  | 0  | 5       | 0  | 254   | 252 | 2  |
| <b>Biosynex</b>   | 3                | 0  | 5         | 0  | 3         | 0  | 92               | 2  | 10                | 0  | 124   | 5  | 0  | 4       | 1  | 249   | 241 | 8  |
| <b>Innovita</b>   | 3                | 0  | 6         | 0  | 2         | 1  | 95               | 1  | 10                | 1  | 129   | 0  | 0  | 4       | 1  | 253   | 249 | 4  |
| <b>Biolidics*</b> | 3                | 0  | 5         | 0  | 2         | 1  | 12               | 2  | 10                | 1  | 41    | 2  | 0  | ND      | ND | 79    | 73  | 6  |
| <b>Veda.Lab</b>   | 3                | 0  | 4         | 1  | 1         | 2  | 72               | 20 | 8                 | 2  | 95    | 34 | 0  | 4       | 1  | 247   | 187 | 60 |
| <b>Finecare</b>   | 3                | 0  | 6         | 0  | 2         | 1  | 96               | 1  | 11                | 0  | 127   | 2  | 0  | 2       | 0  | 251   | 247 | 4  |
| <b>Wondfo</b>     | 3                | 0  | 5         | 1  | 2         | 1  | 94               | 3  | 10                | 1  | 126   | 3  | 0  | 5       | 0  | 254   | 245 | 9  |

TN, True negative ; FP, False positive; NI, Not interpretable; ND, Not determined

\*Only part (79/254) of the collection was tested due to a limited number of tests available

**Table S3.** Usability of the ten RDTs

| RDTs                                            | 1                   | 2                   | 3                   | 4                  | 5                   | 6                   | 7            | 8            | 9         | 10           |
|-------------------------------------------------|---------------------|---------------------|---------------------|--------------------|---------------------|---------------------|--------------|--------------|-----------|--------------|
| <b>Clarity of instruction for user</b>          |                     |                     |                     |                    |                     |                     |              |              |           |              |
| Manufacturer instructions                       | Very clear          | Very clear          | Clear               | Very clear         | Very clear          | Very Clear          | Clear        | Very Clear   | Clear     | Clear        |
| Presence of pictures, schemas                   | methods and results | methods and results | methods and results | methods and result | methods and results | methods and results | results only | results only | none      | methods only |
| <b>Technical complexity</b>                     |                     |                     |                     |                    |                     |                     |              |              |           |              |
| Technical complexity                            | Very easy           | Easy                | Very easy           | Very easy          | Very easy           | Very easy           | Very easy    | Very easy    | Easy      | Very easy    |
| Number of steps                                 | 3                   | 3                   | 3                   | 3                  | 3                   | 3                   | 3            | 3            | 3         | 3            |
| Exact measurements or volumes for specimens     | No (Drop)           | Yes (µl)            | No (Drop)           | Yes (µl)           | Yes (µl)            | Yes (µl)            | No (Drop)    | Yes (µl)     | Yes (µl)  | Yes (µl)     |
| All equipment present in the kit to use test    | Yes                 | No                  | Yes                 | Yes                | Yes                 | No                  | No           | No           | Yes       | No           |
| Easy to identify the well to deposit the sample | Yes                 | Yes                 | Yes                 | Yes                | Yes                 | Yes                 | Yes          | Yes          | Yes       | Yes          |
| Easy to identify the well to deposit buffer     | Yes                 | Yes                 | Yes                 | Yes                | Yes                 | Yes                 | Yes          | Yes          | No        | Yes          |
| <b>Results interpretation</b>                   |                     |                     |                     |                    |                     |                     |              |              |           |              |
| Easiness of results interpretation              | Very easy           | Very easy           | Very easy           | Very easy          | Very easy           | Difficult           | Very easy    | Very easy    | Very easy | Very easy    |
| Reading type                                    | Visual              | Visual              | Visual              | Visual             | Visual              | Visual              | Visual       | Visual       | Visual    | Visual       |
| Time to results (min)                           | <15                 | < 15                | <15                 | <15                | <15                 | <15                 | <15          | <15          | <15       | 15-20        |
| <b>Packaging, legal information</b>             |                     |                     |                     |                    |                     |                     |              |              |           |              |
| T° storage conditions available                 | Yes                 | Yes                 | Yes                 | Yes                | Yes                 | Yes                 | Yes          | Yes          | Yes       | Yes          |
| Product reference available                     | Yes                 | Yes                 | No                  | Yes                | Ye                  | No                  | Yes          | Yes          | Yes       | Yes          |
| Single sealed package                           | Yes                 | Yes                 | Yes                 | Yes                | Yes                 | Yes                 | Yes          | Yes          | Yes       | Yes          |
| Pouch dessicant                                 | Yes                 | Yes                 | Yes                 | Yes                | Yes                 | Yes                 | Yes          | Yes          | Yes       | Yes          |
